# Supplementary material for: Measuring successful aging: an exploratory factor analysis of the InCHIANTI Study into different health domains
Source: publisher site journal article supplement (doi:10.18632/aging.101957), 2019-05-24
Supplement: Supplementary file [file aging-v11i10-101957-supplementary-material-SD1.pdf]

## SUPPLEMENTARY MATERIAL

### Supplementary Figures

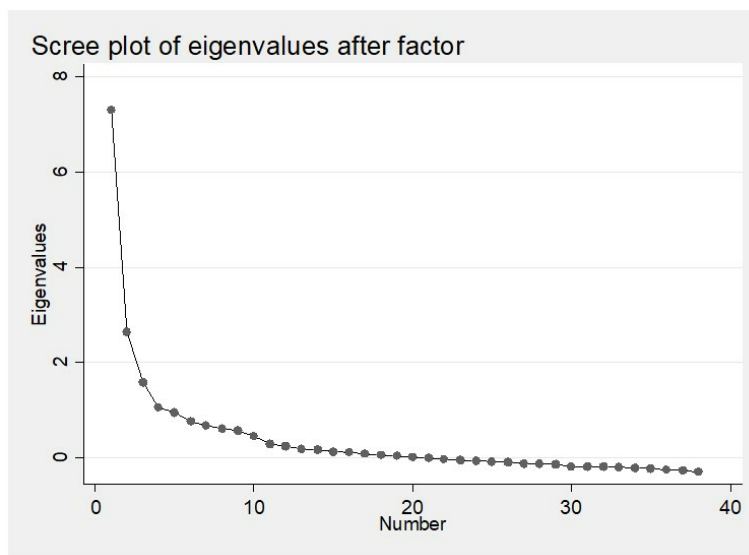

Figure S1. Scree plot: Scree plot demonstrating an elbowing of the curve at factor number three or four.
